# Supplementary material for: GSK3-β Stimulates Claspin Degradation via β-TrCP Ubiquitin Ligase and Alters Cancer Cell Survival
Source: MDPI journal article supplement (doi:10.3390/cancers11081073), 2019-07-29

Figure 1

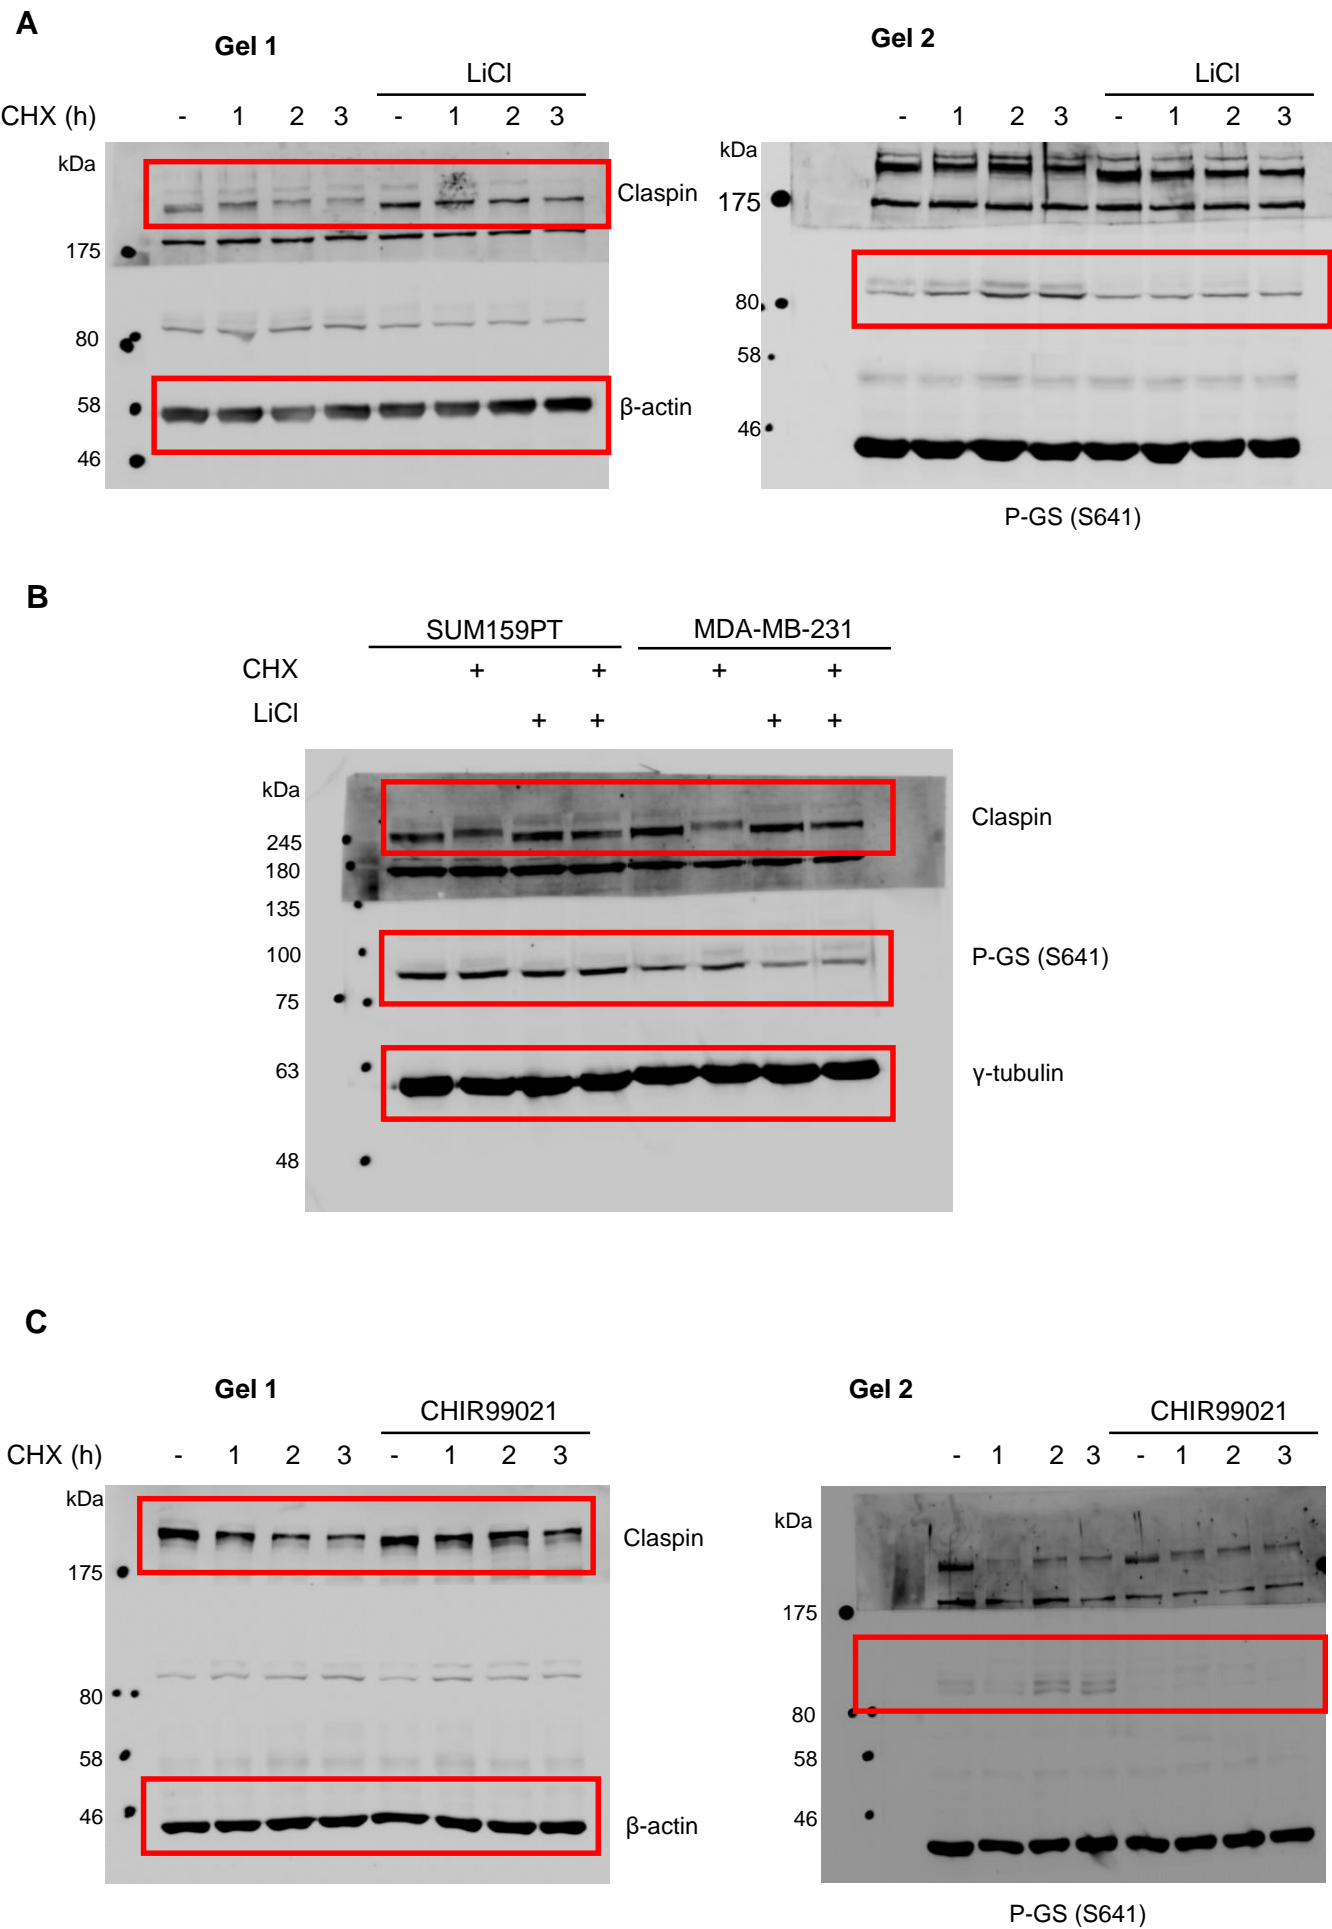

Figure 1

D

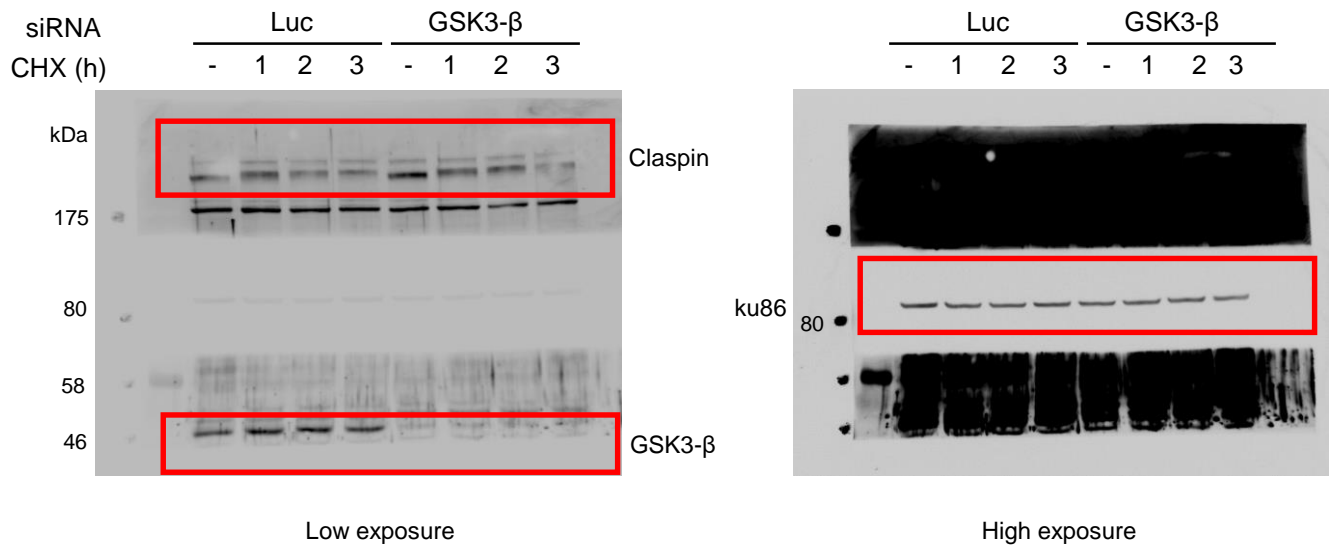

E

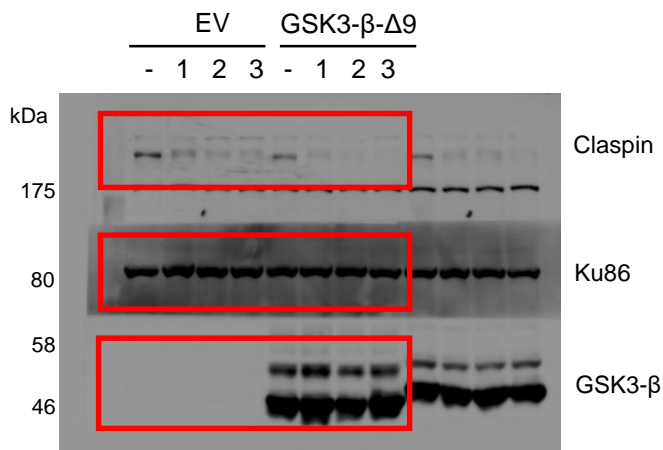

**Figure 2**

**A**

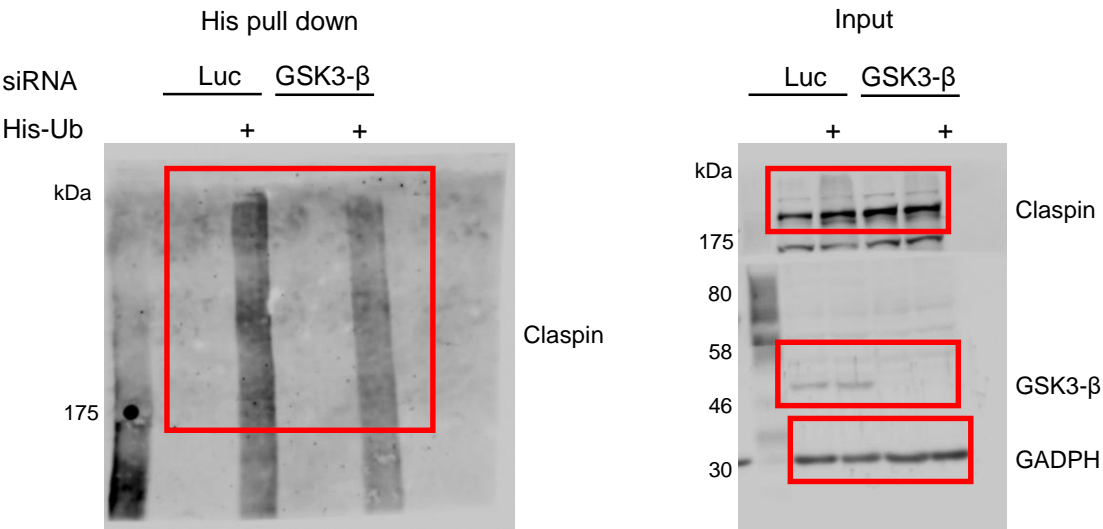

**B**

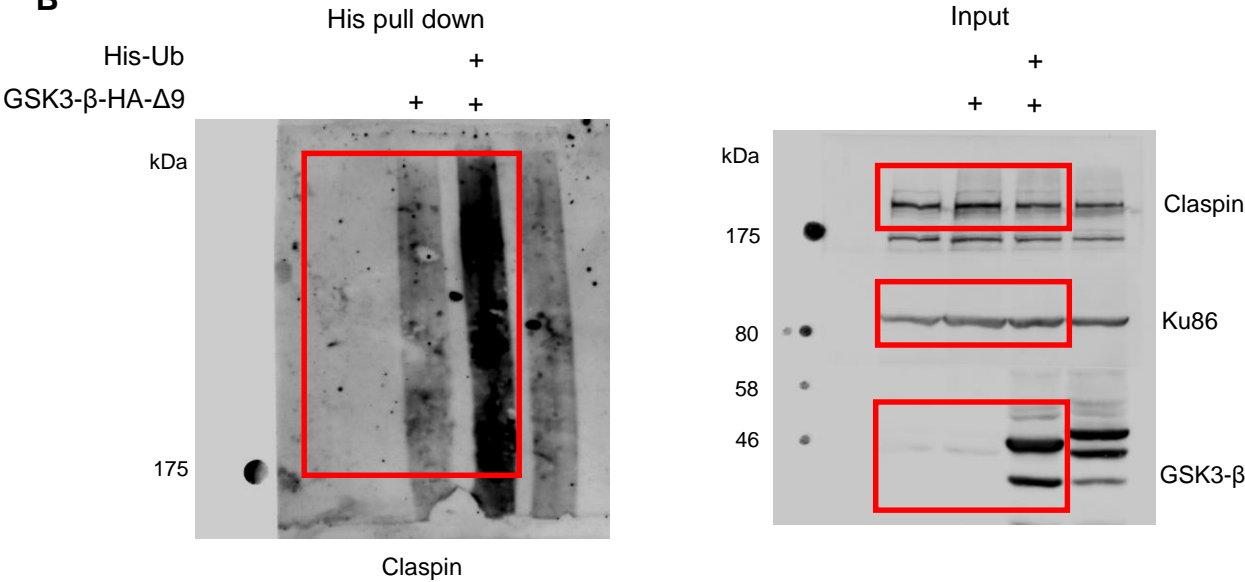

**C**

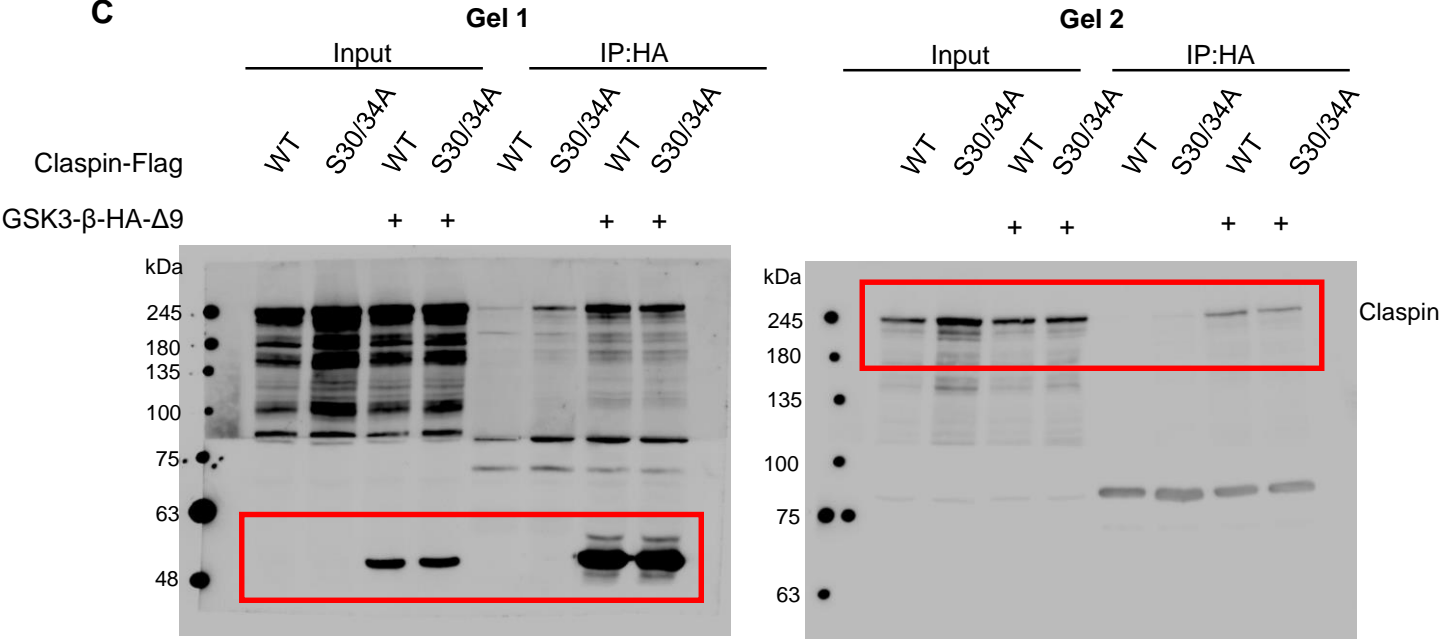

Figure 2

D

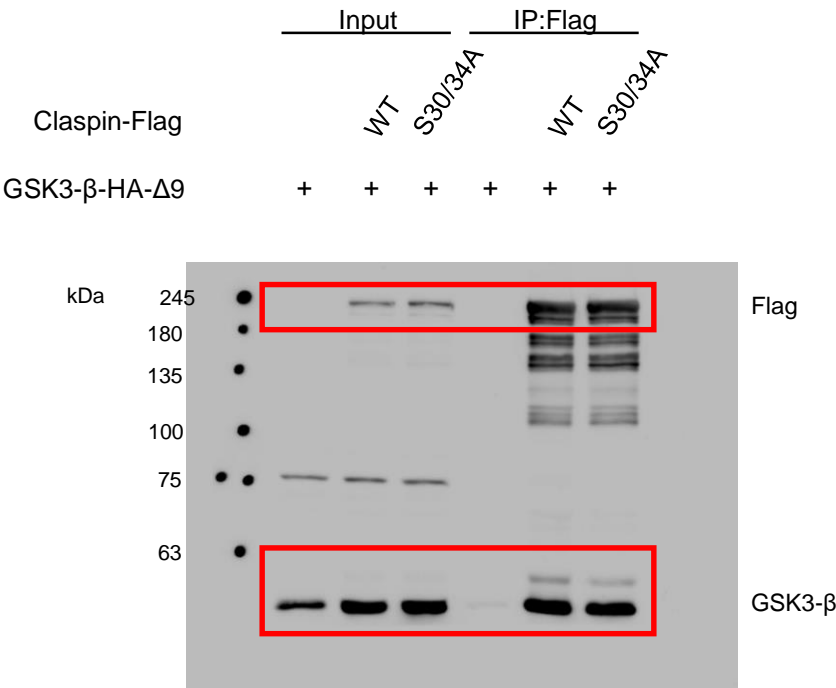

E

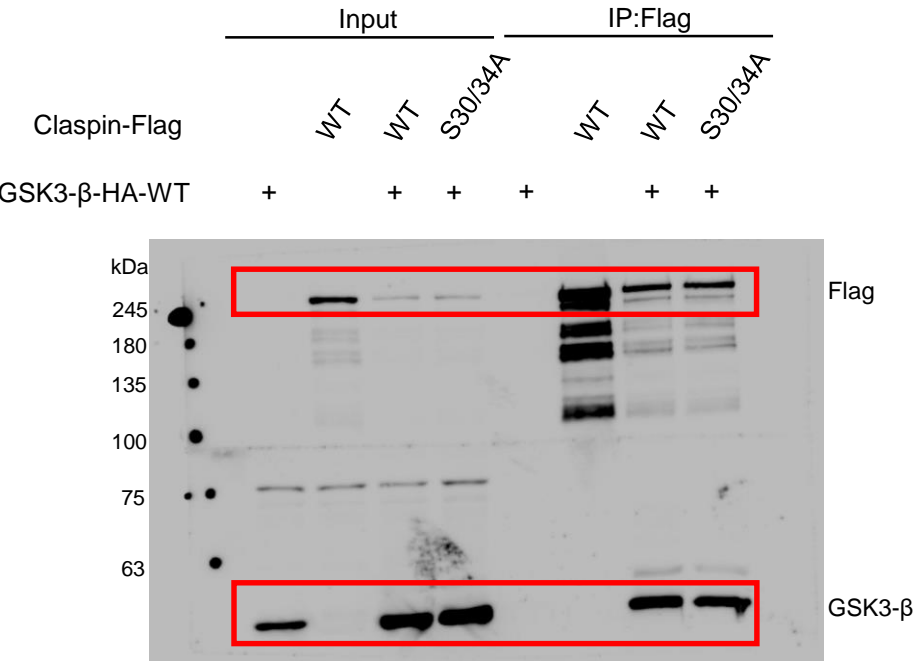

Figure 3

A

Gel 1

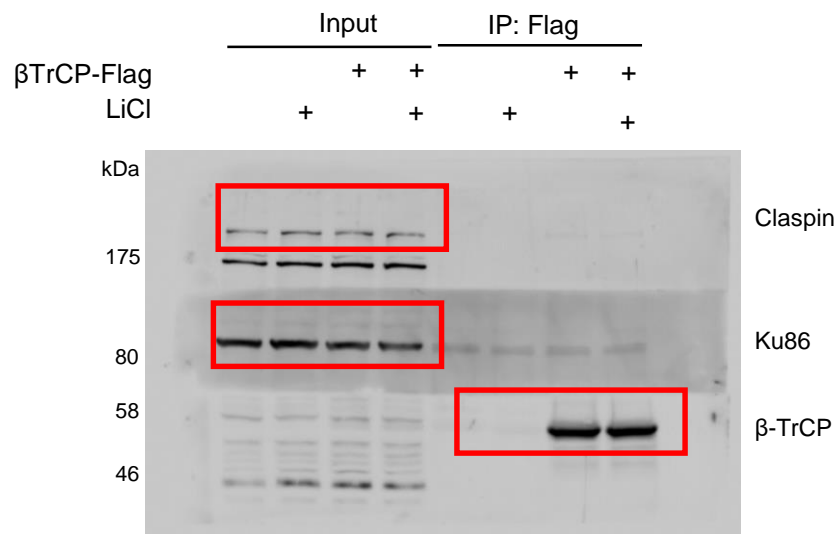

Gel 2

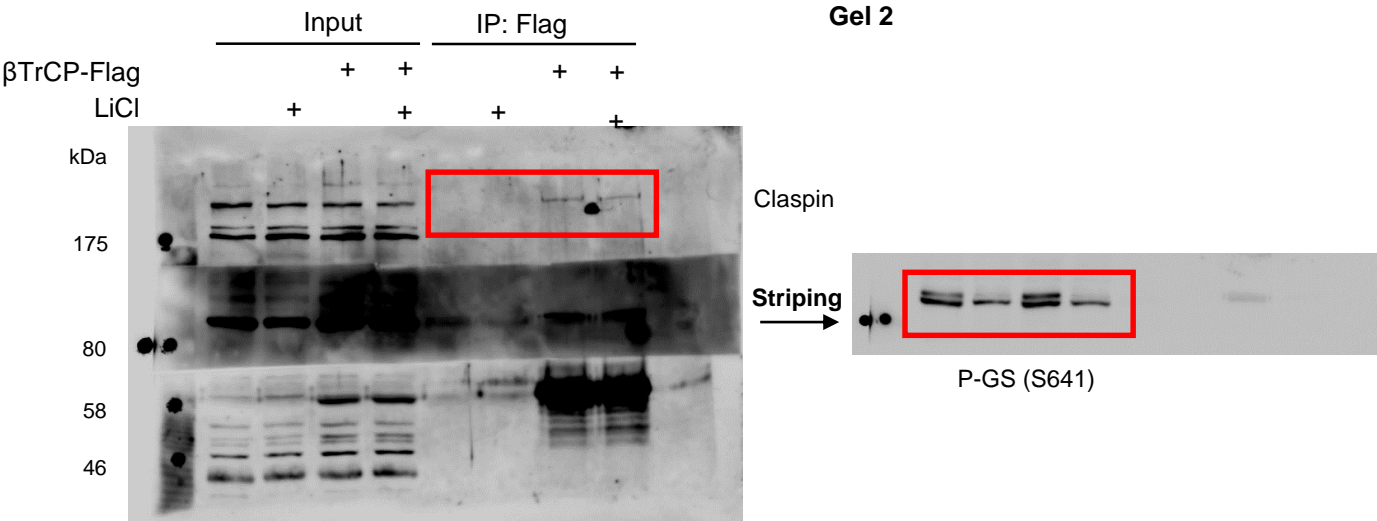

Figure 3

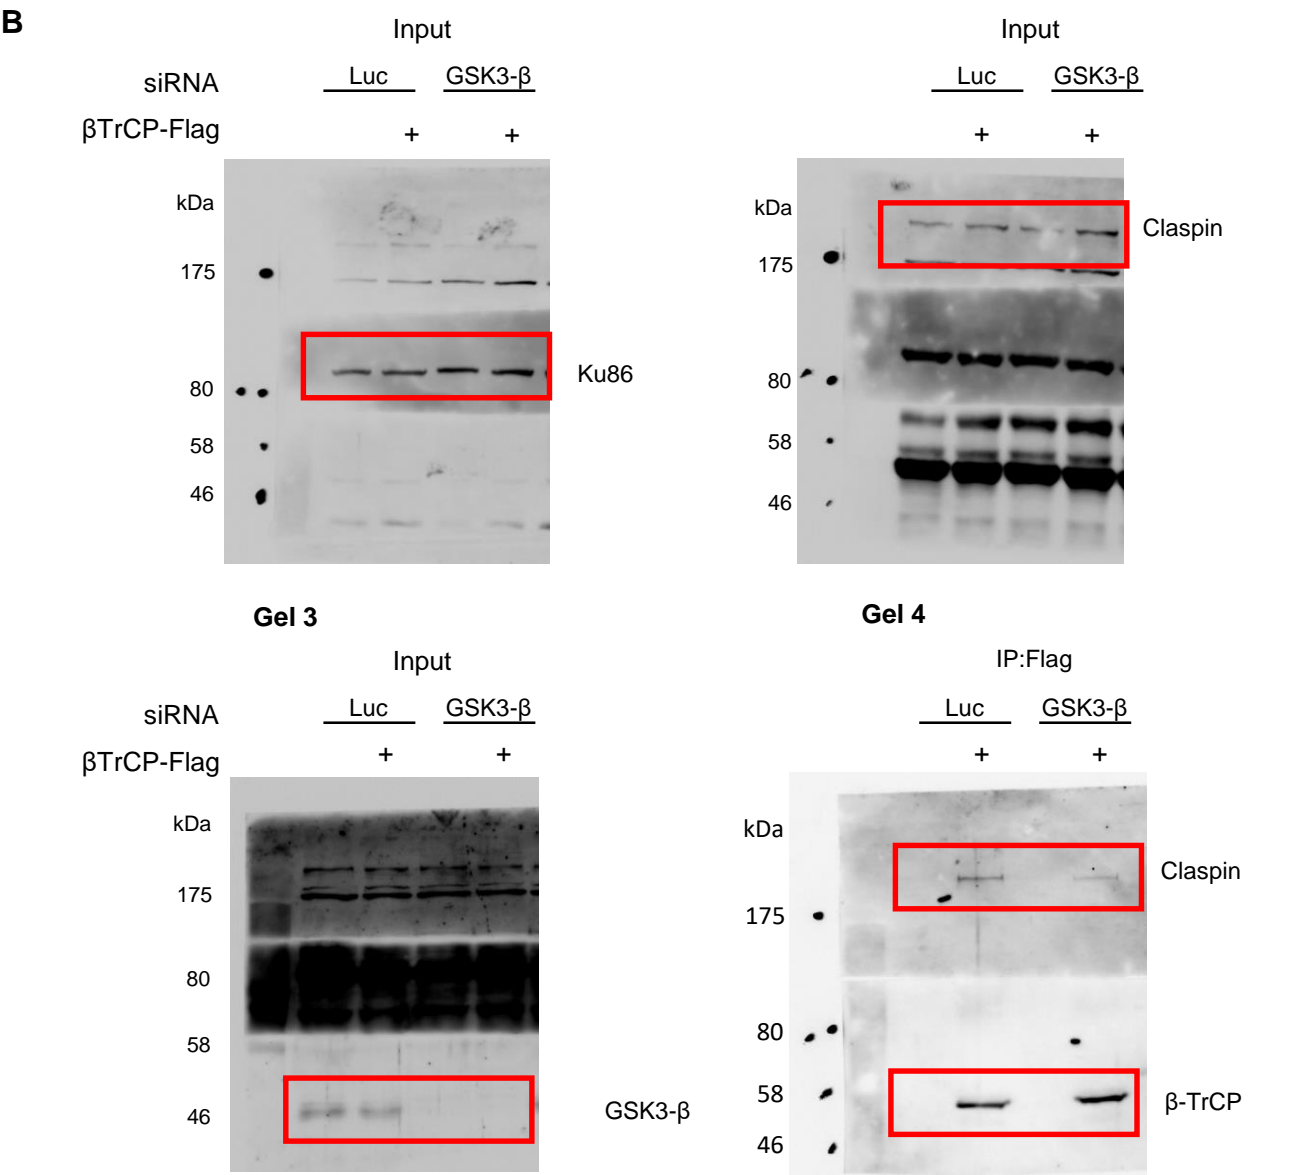

Figure 3

C

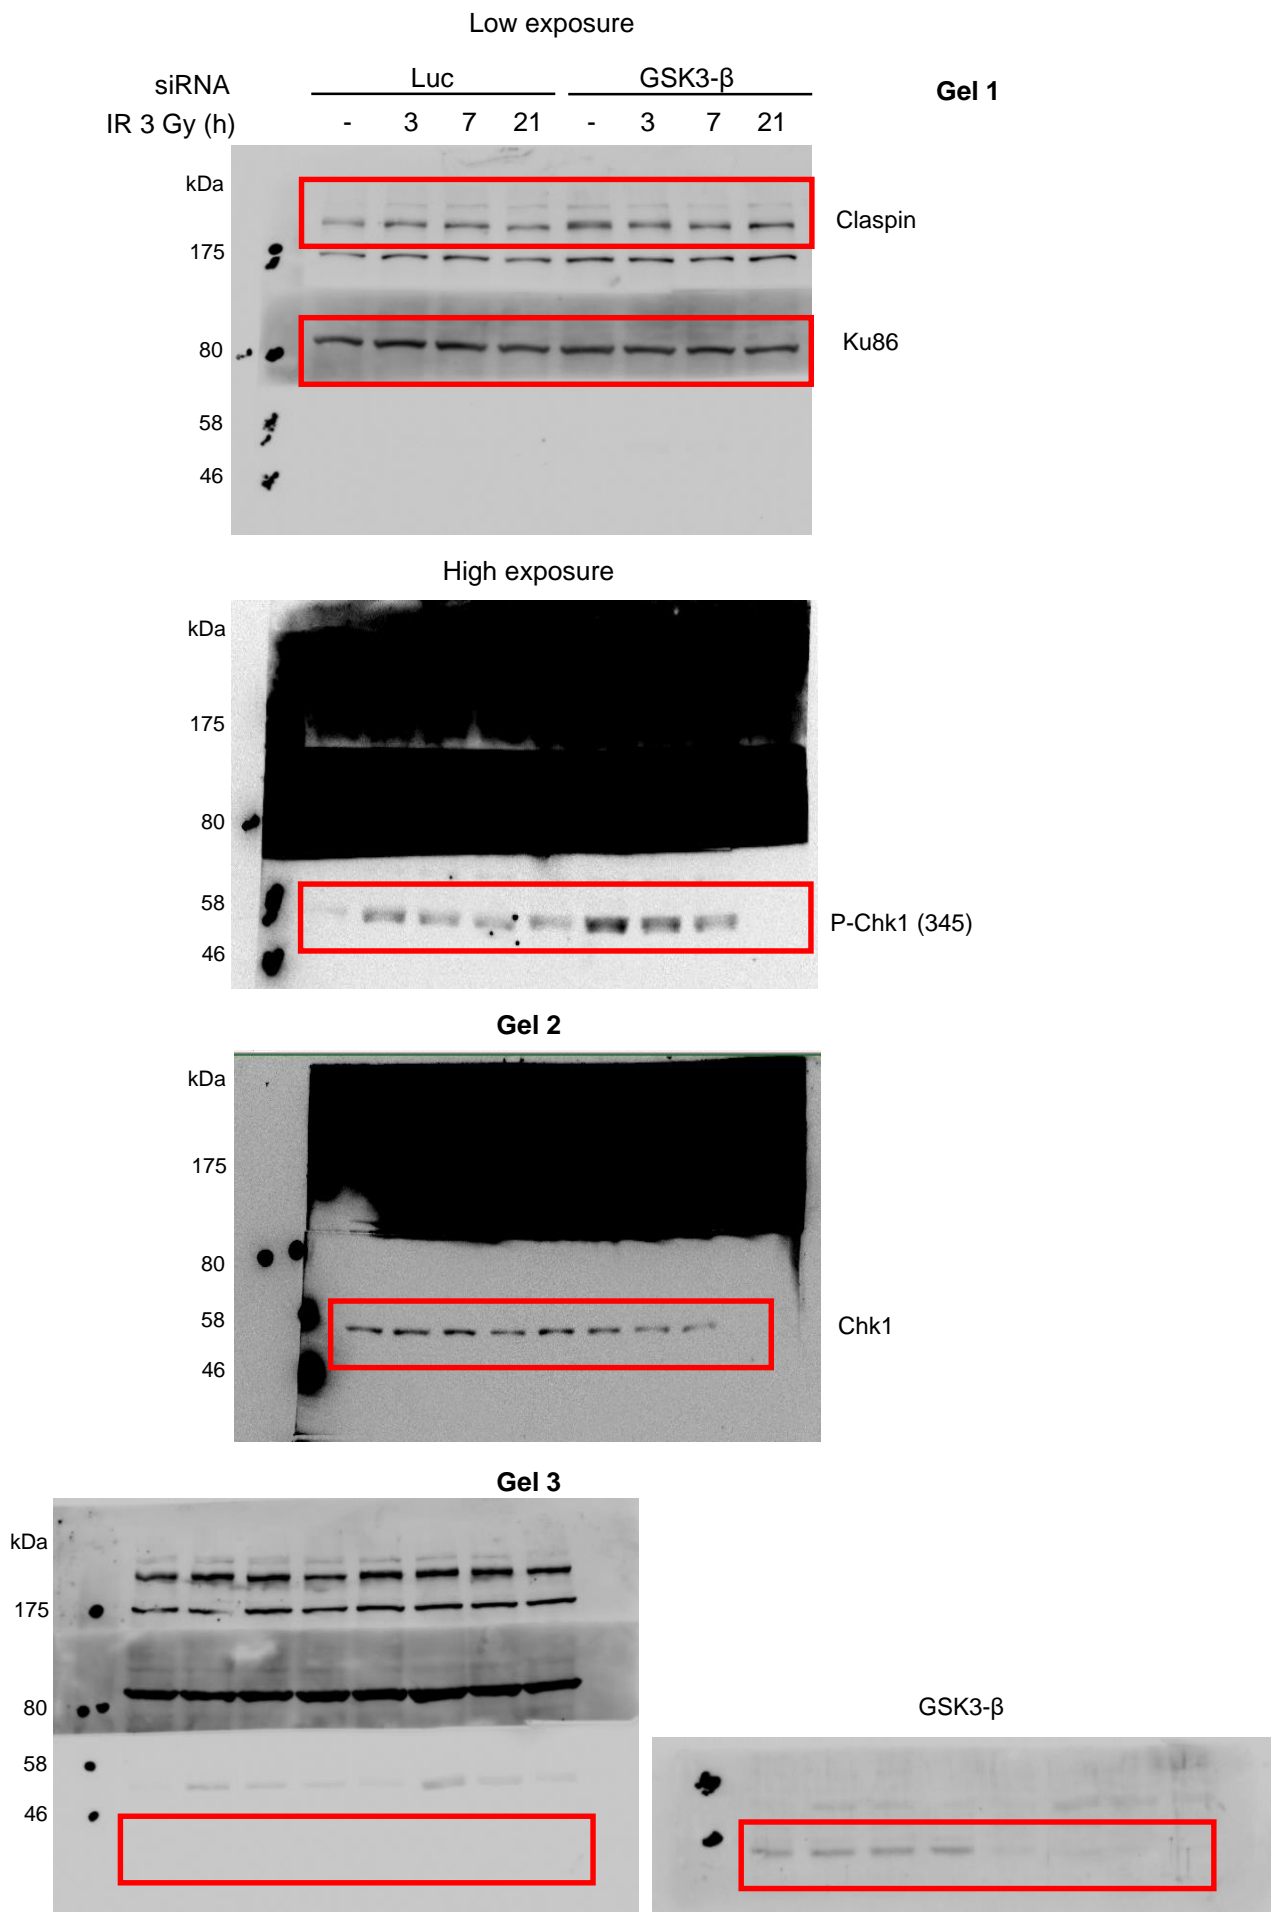

Figure 3

D

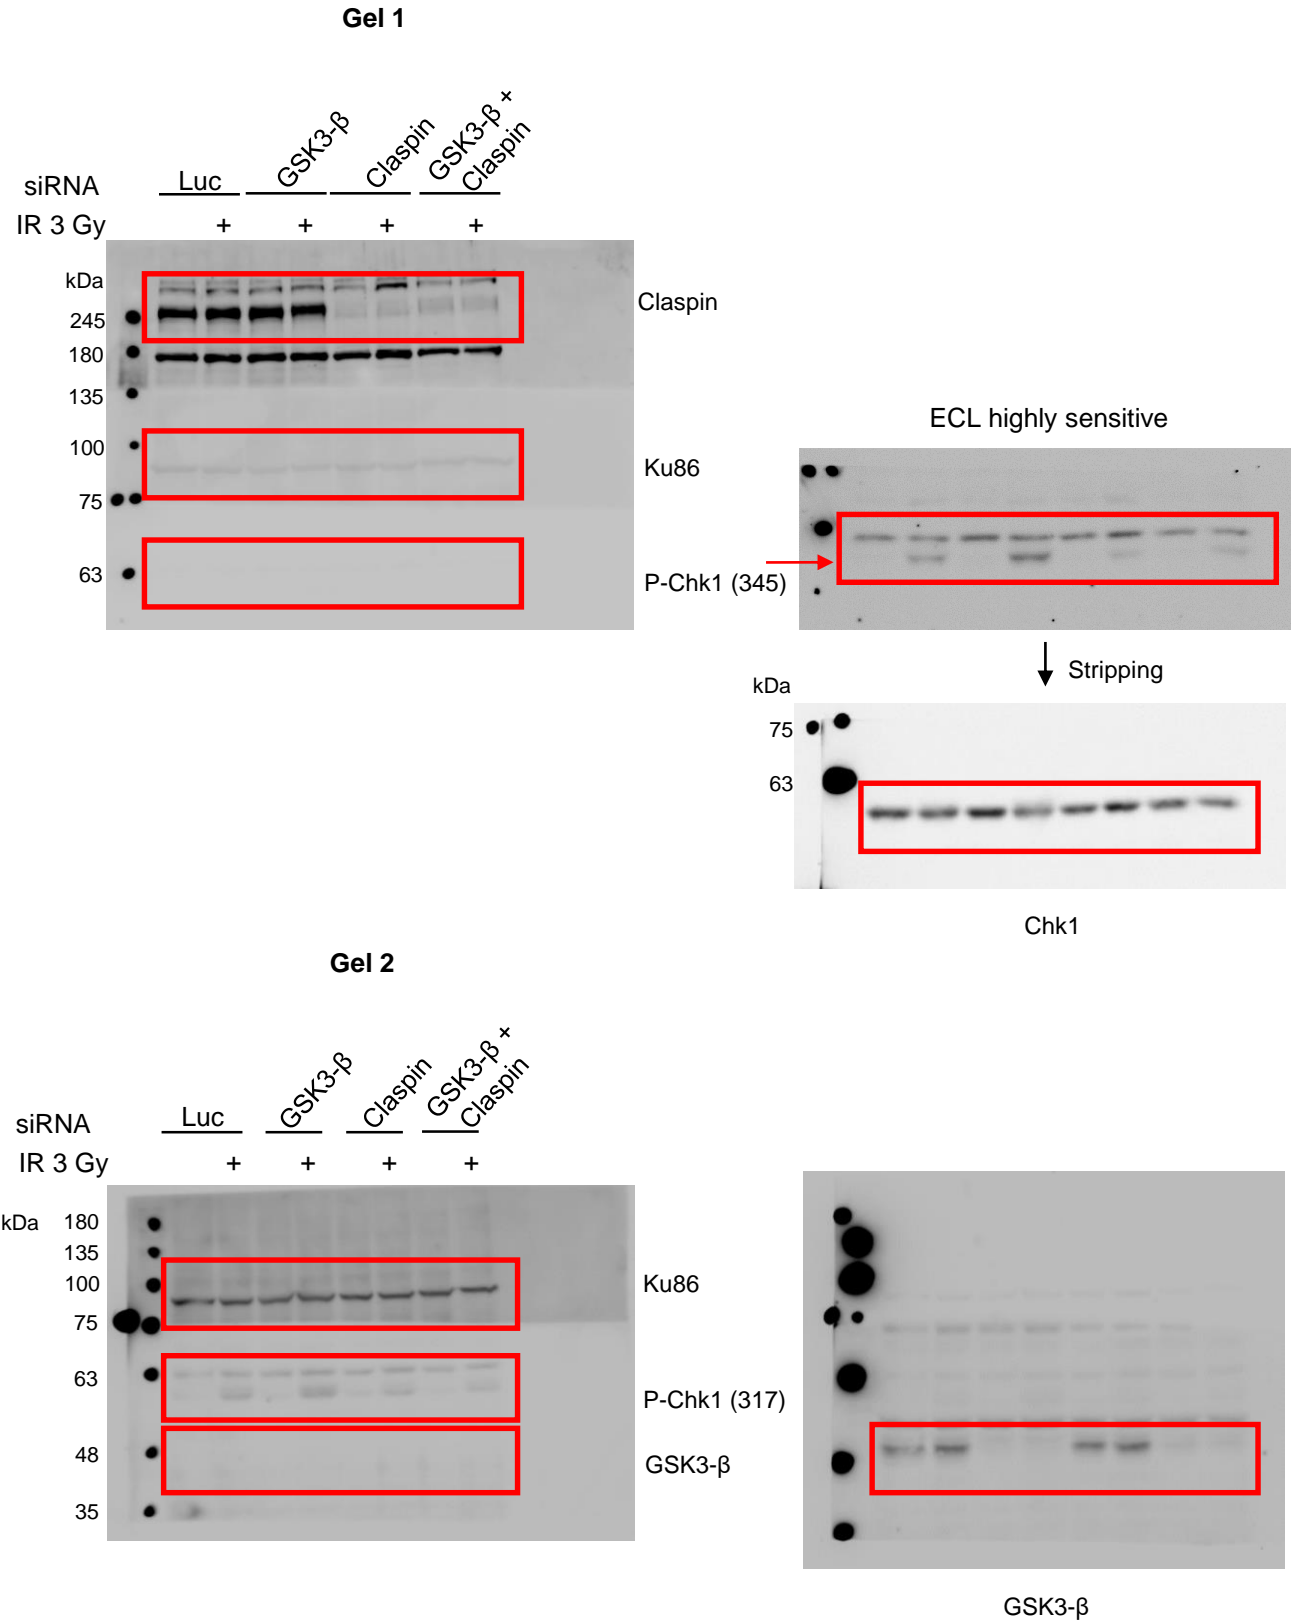



Figure 4

A

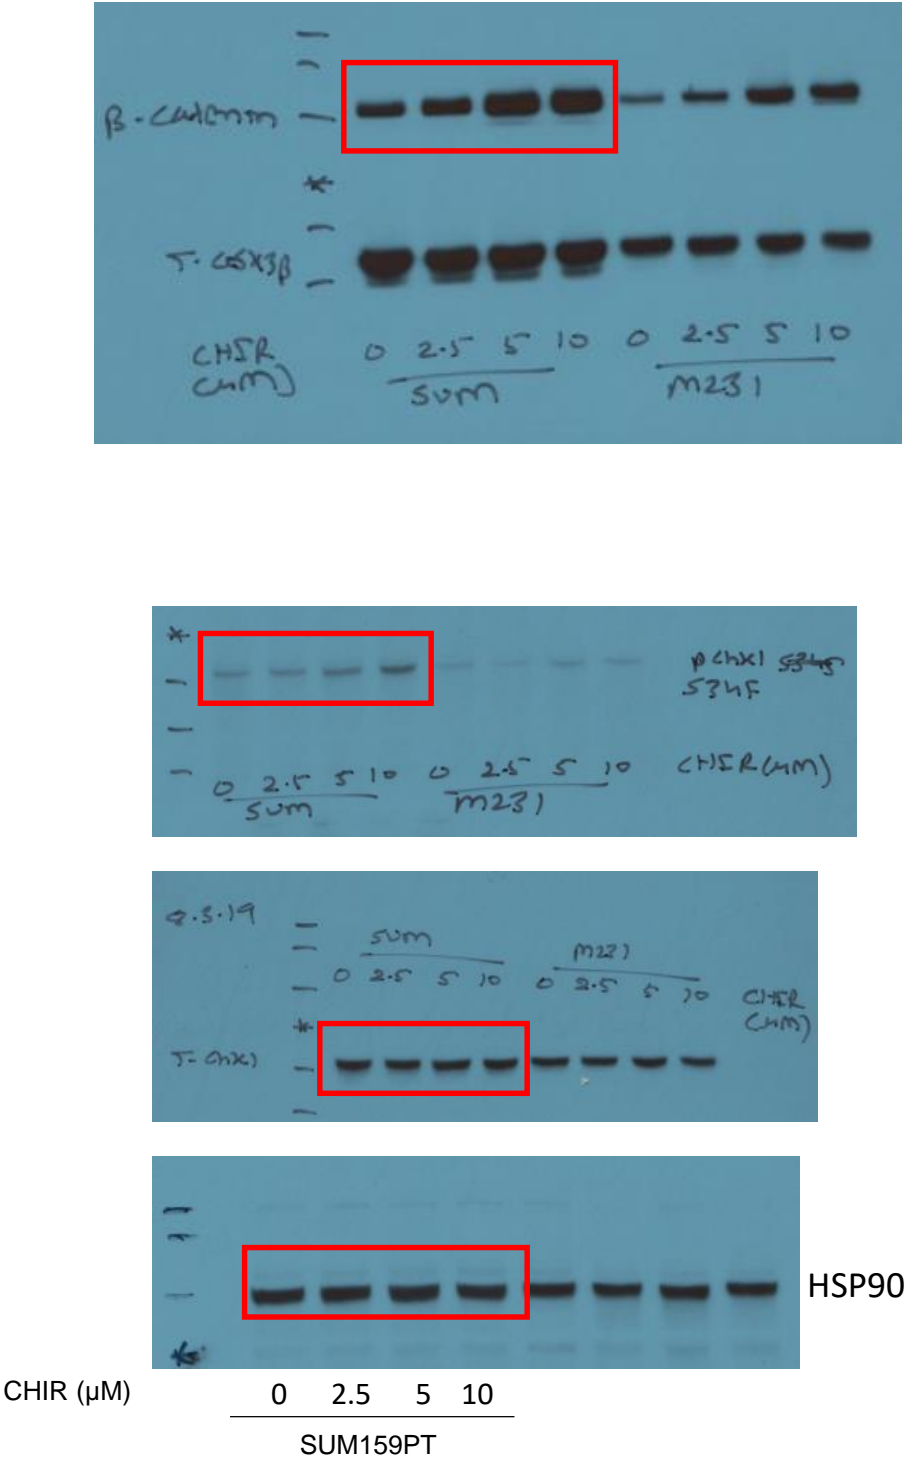

Figure 4

A

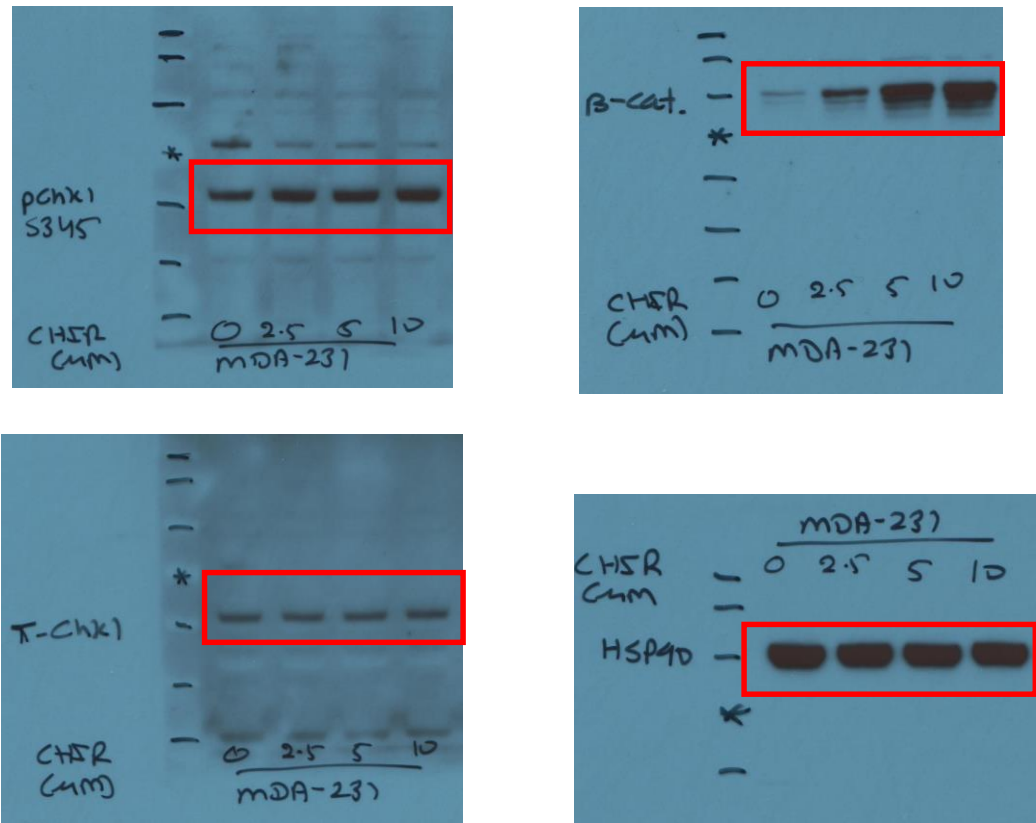

Figure 4

D

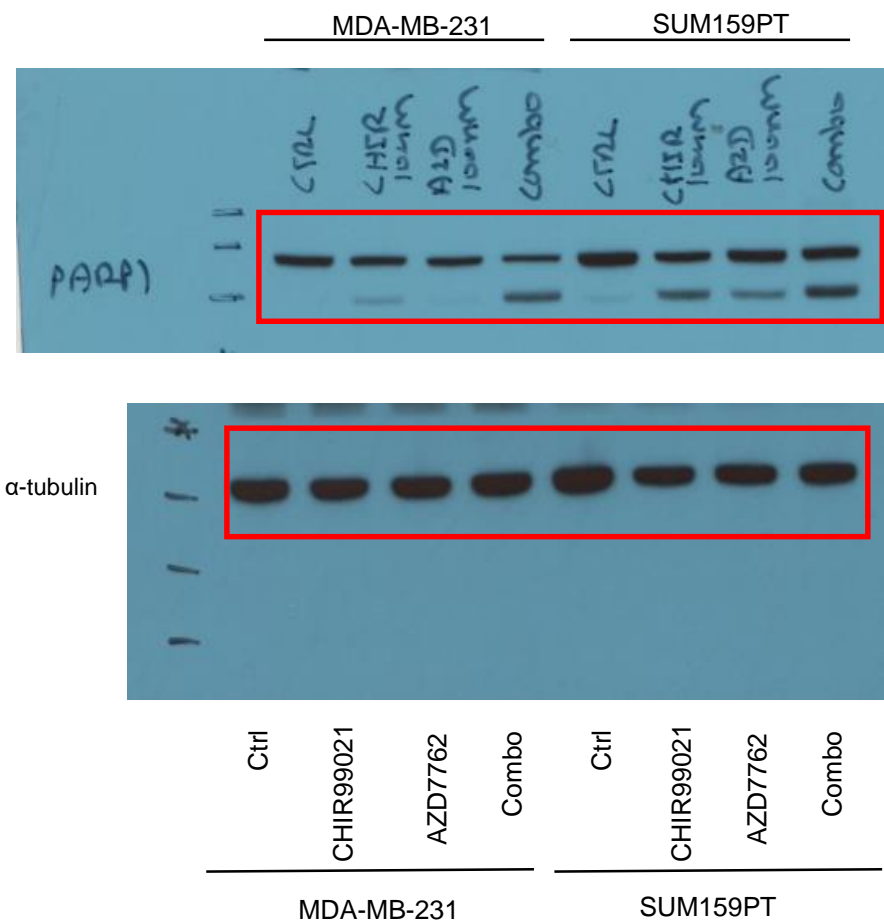

Sup. Fig. 1

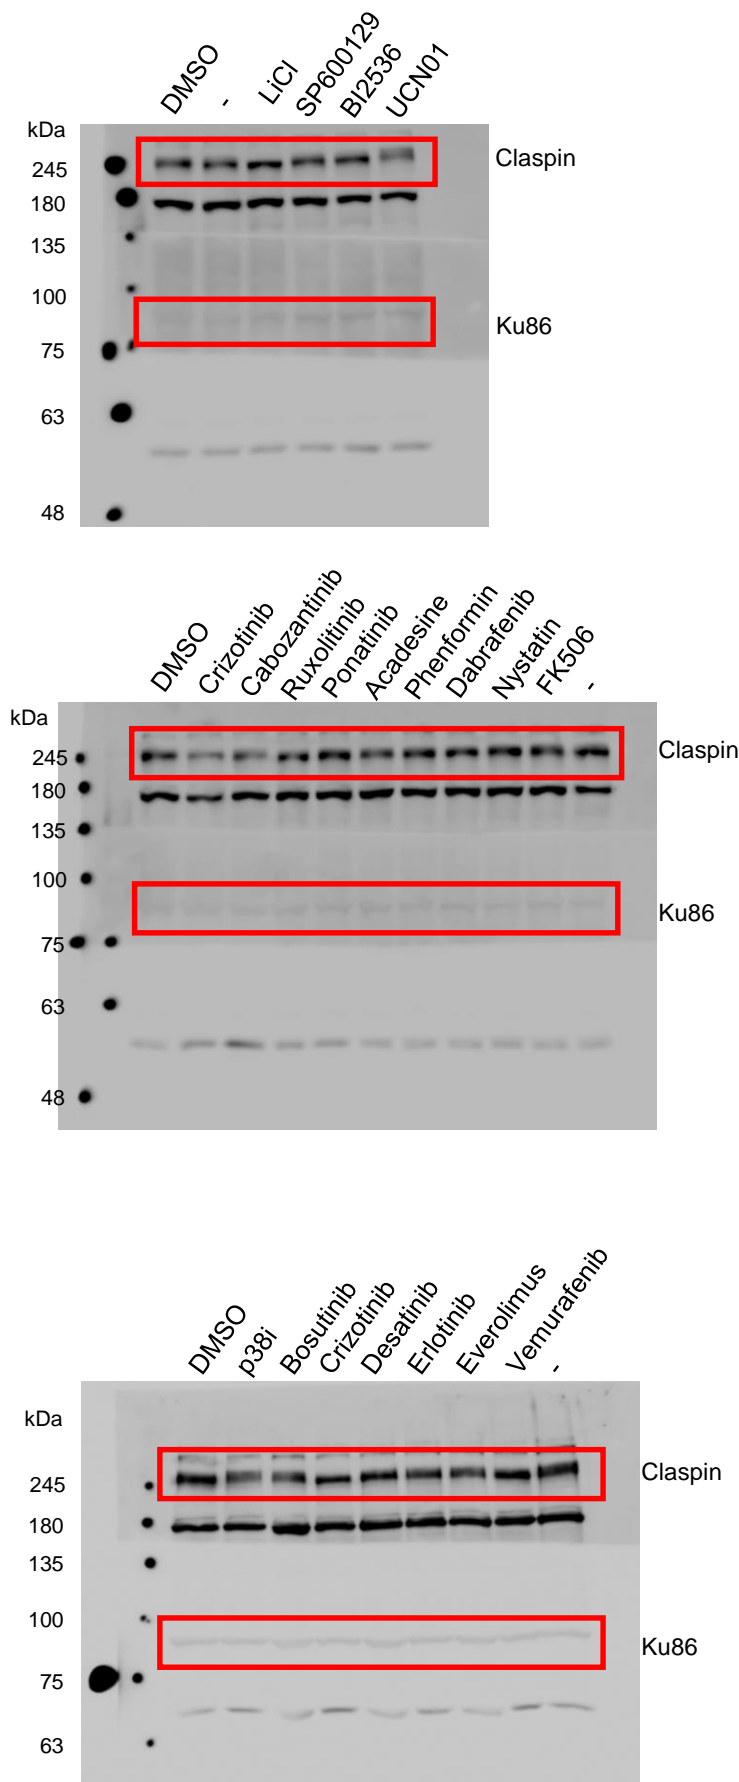

Supplemental data

Sup. Fig. 2A

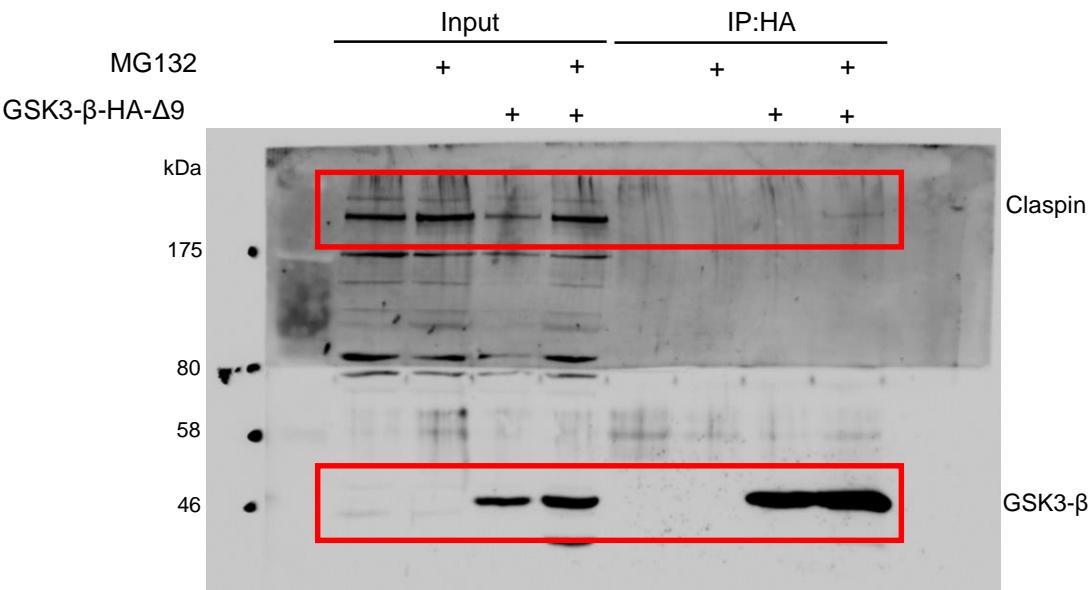

Sup. Fig. 2B

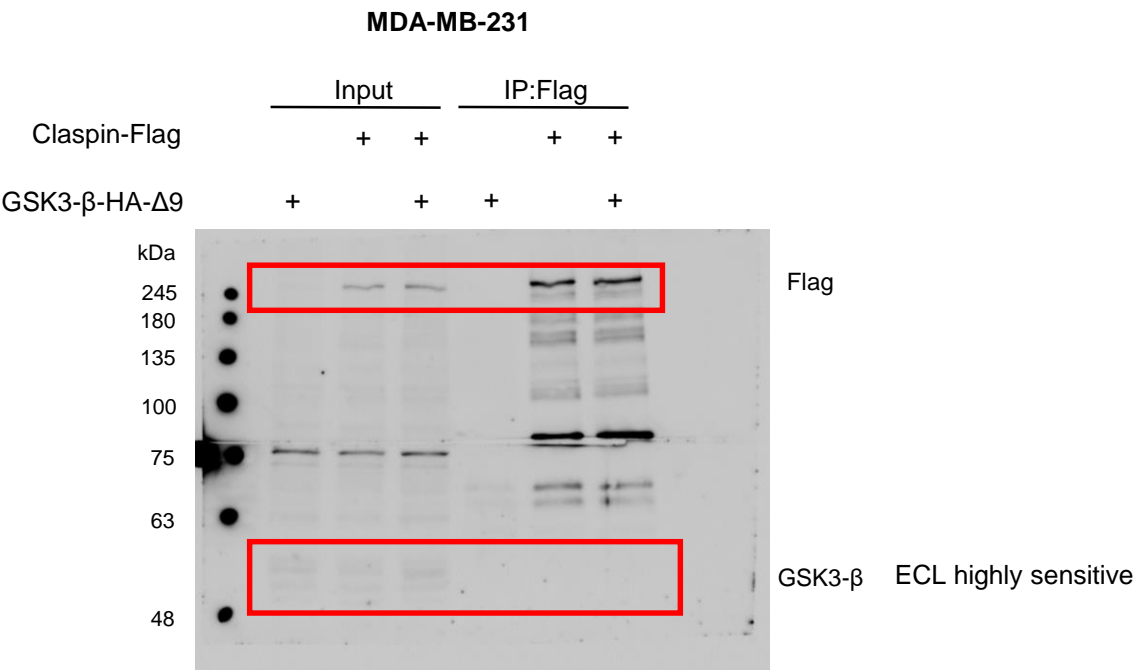

Sup. Fig. 2C

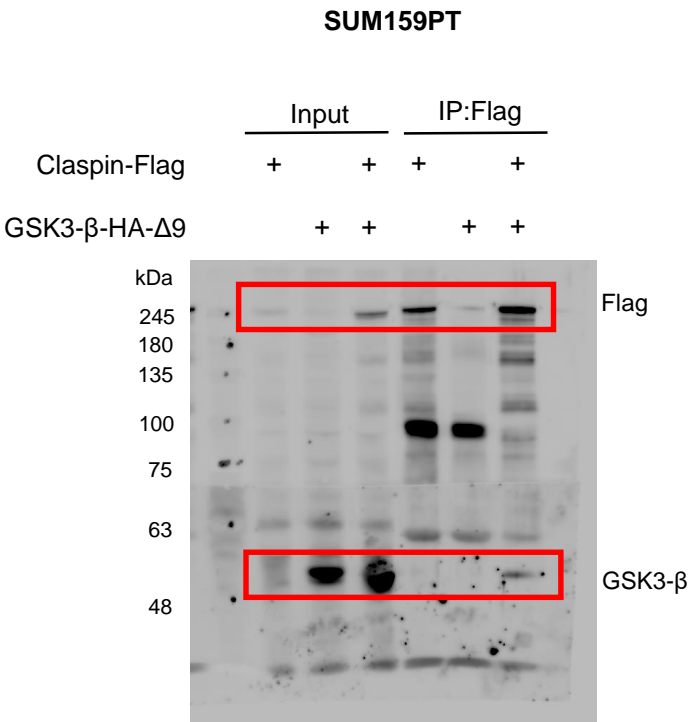

Supplement: s1 [file s1]
